# Supplementary material for: KVPO4F as a novel insertion-type anode for potassium ion batteries
Source: Royal Society of Chemistry journal article supplement (doi:10.1039/c9cc05368a), 2019-01-01
Supplement: c9cc05368a1.pdf [file c9cc05368a1.pdf]

## Supporting information

### **KVPO<sub>4</sub>F as a novel insertion-type anode for potassium ion batteries**

Hong Tan, Xiaoqiong Du, Jian-Qiu Huang, Biao Zhang \*

Department of Applied Physics, the Hong Kong Polytechnic University, Hung Hom, Hong Kong, P.R.

*Corresponding author: Biao Zhang. Email: biao.ap.zhang@polyu.edu.hk*

## Experimental

### **1. KVPO<sub>4</sub>F preparation**

KVPO<sub>4</sub>F was prepared by a sol-gel method. For a typical synthesis, 0.92 g NH<sub>4</sub>H<sub>2</sub>PO<sub>4</sub>, 0.936 g H<sub>4</sub>NO<sub>3</sub>V, 0.557 g KF and 1.228 g citric acid were first dissolved in 30 ml deionized water by sequence in a 50 ml beaker with stirring. After evaporating the water under continuous stirring at 80 °C, the obtained mixture was transferred to a vacuum oven at 60 °C overnight. Prior to thermal treatment, the dried mixture was finely ground into powder in an agate mortar. The green-colored powder was then annealed in a tube furnace at 700 °C for 8 h under Ar protection. The obtained black powder was directly used for the subsequent characterization and electrochemical test without further treatment.

### **2. Material Characterization**

The phase was determined by X-ray diffraction (XRD) performing on a Rigaku Smart Lab 9kW diffractometer using Cu-K $\alpha$  radiation ( $\lambda=1.54178\text{\AA}$ ). The morphology of the sample was characterized by scanning electron microscopy (TESCAN MAIA3) and transmission electron microscopy (JEOL Model JEM-2100F).

### **3. Electrochemical test**

For the fabrication of KVPO<sub>4</sub>F electrode, 70 wt% KVPO<sub>4</sub>F, 20 wt% carbon black and 10 wt% Polyvinylidene fluoride (PVDF) were first dry-mixed in an agate mortar and then wet-mixed with N-Methyl-2-pyrrolidone (NMP) to form a homogeneous slurry.

The obtained slurry was cast onto a copper foil and dried in an oven at 60 °C overnight. Discs with a diameter of 12 mm were cut from the dried tape to employ as the anodes for half-cell assembly while potassium plate was used as counter electrode. To examine the performance of KVPO<sub>4</sub>F as cathode, aluminum foil, instead of copper foil, was used to prepare the electrodes. For in-situ XRD test, the aforementioned electrode slurry was cast on a Be window. The typical loading of KVPO<sub>4</sub>F is around 2 mg for each electrode. 1 M KPF<sub>6</sub> in ethylene carbonate (EC)/propylene carbonate (PC) (1:1 in volume) was used as electrolyte and the glass fiber (Whatman, GF/D) was employed as a separator. The half-cell was assembled in a standard CR2032 coin cell configuration and the symmetric KVPO<sub>4</sub>F full cell was assembled in a two-electrode Swagelok cell. Typically, for the fabrication of symmetric KVPO<sub>4</sub>F full cells, the active mass ratio of cathode versus anode is maintained at around 2:1. All assembly was carried out in an argon-filled glove box with O<sub>2</sub> and H<sub>2</sub>O content less than 0.5 ppm. For the XRD characterization of the electrode after cycles, the cell was disassembled in glove box and the electrode was washed with DMC for several times before it was sealed in an in-situ XRD holder with a beryllium window. The galvanostatic tests were performed on LAND CT2001A Battery Testing systems. Cyclic voltammetry (CV) tests were conducted on a Solartron Analytical 1400 electrochemical workstation.

## Supporting figures and tables

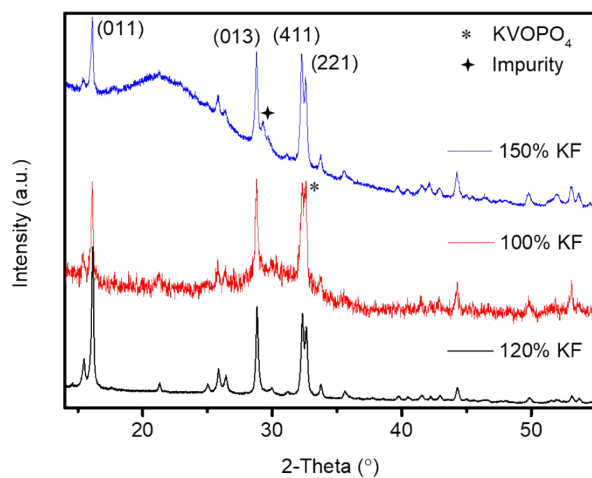

Figure S1. XRD patterns of the samples prepared with various KF content (100%, 120% and 150%) based on the stoichiometric composition of KVPO<sub>4</sub>F. The high peak intensity at 32.6 degree indicates the presence of KVPO<sub>4</sub>.<sup>1</sup>

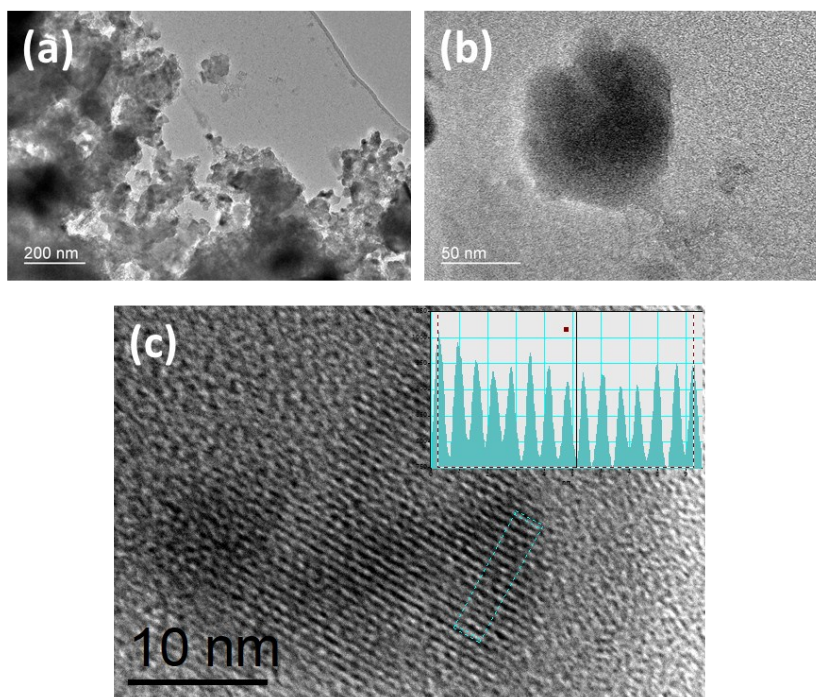

Figure S2. (a), (b) TEM images of as-obtained KVPO<sub>4</sub>F and (c) high-magnification TEM image showing an interlayer spacing of 6.42 Å, indexed to the (200) plane.

The Rietveld refinement results including parameters and crystallographic data of the as-prepared KVPO<sub>4</sub>F is shown in Table S1. The CIF profile proposed by Fedotov et al<sup>2</sup> was used as a starting structure model for the refinement.

Table S1. Rietveld refinement results of the obtained KVPO<sub>4</sub>F

| <b>KVPO<sub>4</sub>F</b>               |          | <b>Space group Pna2<sub>1</sub></b> |           |            |     |                  |
|----------------------------------------|----------|-------------------------------------|-----------|------------|-----|------------------|
| a=12.8289 Å b=6.4046 Å c=10.6038 Å z=8 |          | V=871.26 Å <sup>3</sup>             |           |            |     |                  |
| Atom                                   | Position | x/a                                 | y/b       | z/c        | Occ | B <sub>iso</sub> |
| K1                                     | 4a       | 0.3705(5)                           | 0.778(1)  | 0.290(5)   | 0.5 | 1.8(1)           |
| K1'                                    | 4a       | 0.3876(6)                           | 0.778(3)  | 0.321(3)   | 0.5 | 1.8(1)           |
| K2                                     | 4a       | 0.1075(5)                           | 0.719(2)  | 0.043(2)   | 0.5 | 1.8(1)           |
| K2'                                    | 4a       | 0.0937(3)                           | 0.679(1)  | 0.0728(12) | 0.5 | 1.8(1)           |
| V1                                     | 4a       | 0.3831(3)                           | 0.4915(3) | 0          | 1   | 0.75(5)          |
| V2                                     | 4a       | 0.2478(3)                           | 0.2535(3) | 0.2489(10) | 1   | 0.75(5)          |
| P1                                     | 4a       | 0.502(4)                            | 0.333(3)  | 0.257(3)   | 1   | 0.75(5)          |
| P2                                     | 4a       | 0.1819(12)                          | 0.4968(9) | 0.4935(9)  | 1   | 0.75(5)          |
| O1                                     | 4a       | 0.486(2)                            | 0.479(1)  | 0.143(2)   | 1   | 1.0(1)           |
| O2                                     | 4a       | 0.519(2)                            | 0.479(4)  | 0.372(1)   | 1   | 1.0(1)           |
| O3                                     | 4a       | 0.401(2)                            | 0.212(3)  | 0.290(9)   | 1   | 1.0(1)           |
| O4                                     | 4a       | 0.592(7)                            | 0.207(7)  | 0.229(10)  | 1   | 1.0(1)           |
| O5                                     | 4a       | 0.118(3)                            | 0.312(6)  | 0.532(4)   | 1   | 1.0(1)           |
| O6                                     | 4a       | 0.108(3)                            | 0.673(6)  | 0.467(5)   | 1   | 1.0(1)           |
| O7                                     | 4a       | 0.242(3)                            | 0.537(7)  | 0.629(7)   | 1   | 1.0(1)           |
| O8                                     | 4a       | 0.250(3)                            | 0.462(3)  | 0.391(6)   | 1   | 1.0(1)           |
| F1                                     | 4a       | 0.272(1)                            | 0.524(2)  | 0.867(10)  | 1   | 1.0(1)           |
| F2                                     | 4a       | 0.272(2)                            | 0.483(1)  | 0.121(4)   | 1   | 1.0(1)           |

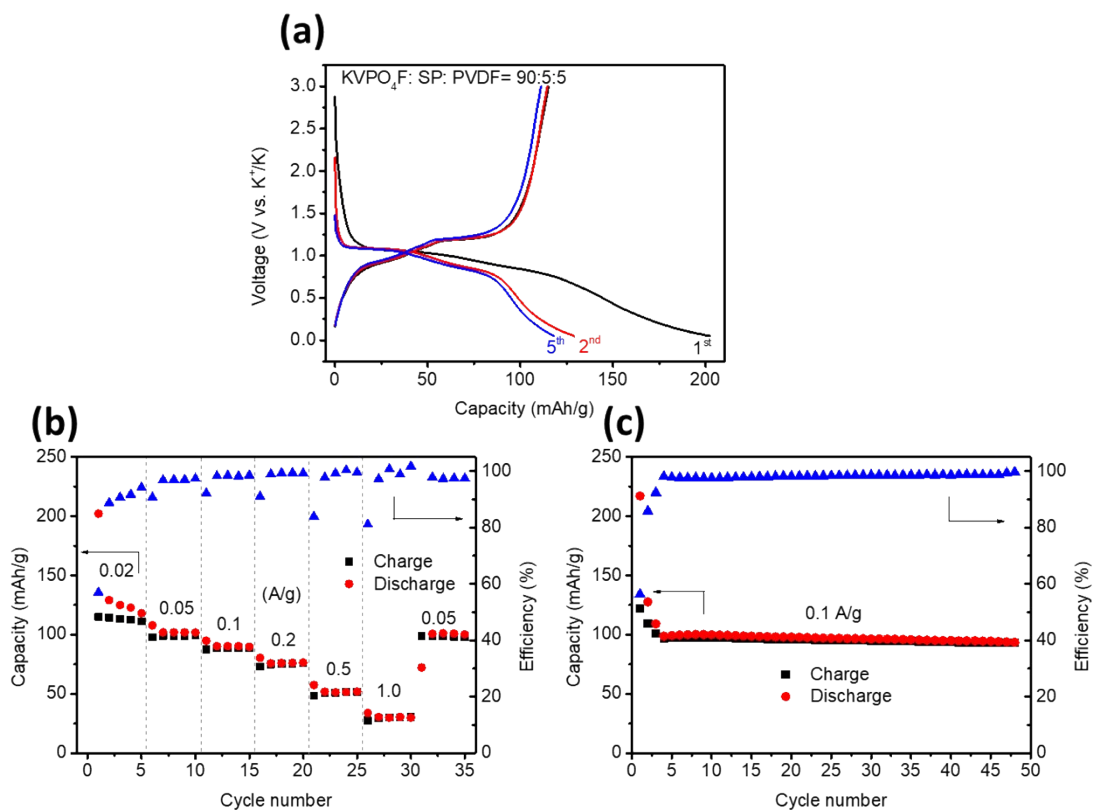

Figure S3. (a) Voltage profiles (b) Rate capability and (c) Cyclic performance of electrodes with 90 wt.% KVPO<sub>4</sub>F.

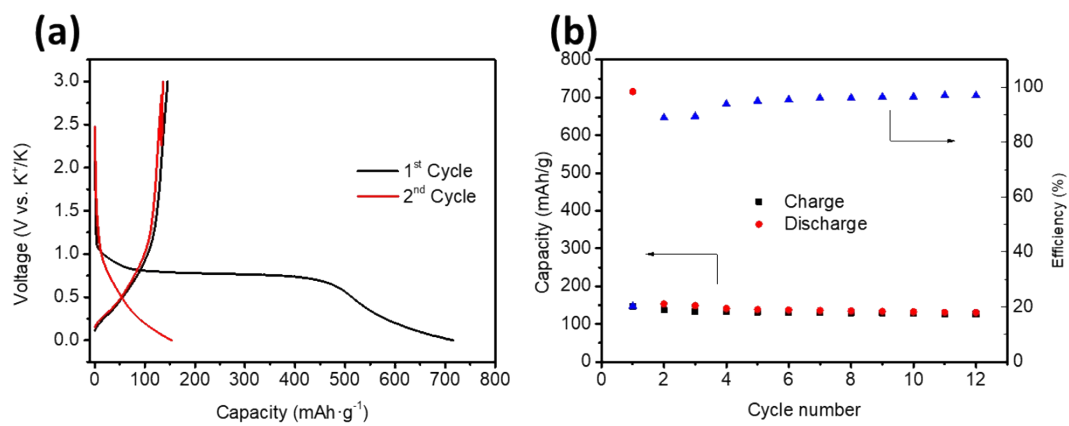

Figure S4. (a) Voltage profiles of the 1<sup>st</sup> and 2<sup>nd</sup> cycle and (b) cycling test of pure carbon black as anode for K-ion half-cell.

The GITT test was carried out to evaluate the diffusion coefficient of KVPO<sub>4</sub>F at 25 °C. The discharge/charge duration time is set as 30 min while the rest interval is set as 2 h. The calculation of the diffusion coefficient was based on previous work.<sup>3</sup> As shown in equation (1),  $m_B$  is the mass of active material of electrode,  $M_B$  is the molar mass of KVPO<sub>4</sub>F,  $V_M$  is the molar volume of KVPO<sub>4</sub>F, the theoretical density  $\rho$  of KVPO<sub>4</sub>F was calculated based on the crystallographic data obtained by refinement following Rachel Rosten's method.<sup>4</sup>  $S$  is the geometric area of the electrode, the value of which is 1.13 cm<sup>2</sup> in this case,  $\tau$  is the duration time upon each charge/discharge.

$$D = \frac{4}{\pi\tau} \left( \frac{m_B V_M}{M_B S} \right)^2 \left( \frac{\Delta E_s}{\Delta E_\tau} \right)^2 \quad \text{--- (1)}$$

The diffusion coefficients deduced from the GITT profiles and equation (1) are depicted in Fig. S5.

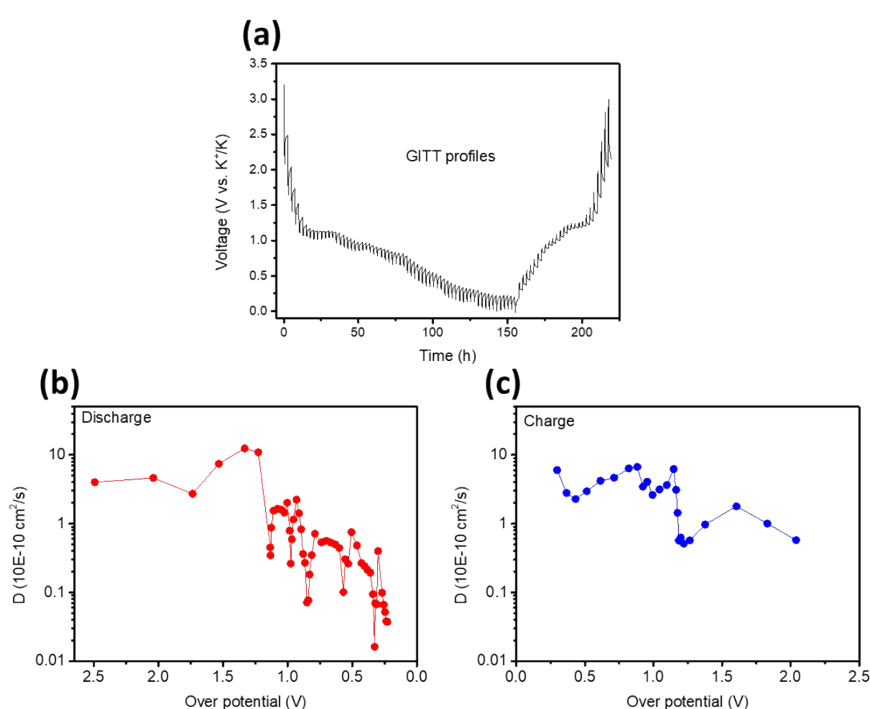

Figure S5. (a) GITT profiles of KVPO<sub>4</sub>F and the diffusion coefficients deduced from the GITT profiles as a function of the cell potential upon (b) discharge and (c) charge.

Table S2. Comparison of the performance of insertion type anode and graphite for K-ion batteries

| Insertion type anode                               | Reversible capacity                               | Capacity retention                               | Rate capability                                    | Electrolyte                                                 | Loading                       | Reference |
|----------------------------------------------------|---------------------------------------------------|--------------------------------------------------|----------------------------------------------------|-------------------------------------------------------------|-------------------------------|-----------|
| <b>K<sub>2</sub>Ti<sub>6</sub>O<sub>13</sub></b>   | 90 mAh·g <sup>-1</sup> at 50 mA·g <sup>-1</sup>   | 84 % after 1000 cycles at 500 mA·g <sup>-1</sup> | 57 mAh·g <sup>-1</sup> at 1000 mA·g <sup>-1</sup>  | 0.8 mol·L <sup>-1</sup> KPF <sub>6</sub> in PC/FEC (5%)     | -                             | 5         |
| <b>K<sub>2</sub>Ti<sub>4</sub>O<sub>9</sub></b>    | 80 mAh·g <sup>-1</sup> at 100 mA·g <sup>-1</sup>  | 50 % after 30 cycles at 100 mA·g <sup>-1</sup>   | 20 mAh·g <sup>-1</sup> at 2000 mA·g <sup>-1</sup>  | 1 mol·L <sup>-1</sup> KPF <sub>6</sub> in EC/PC(1:1)        | 2.0 - 3.0 mg·cm <sup>-2</sup> | 6         |
| <b>K<sub>2</sub>Ti<sub>8</sub>O<sub>17</sub></b>   | 181 mAh·g <sup>-1</sup> at 20 mA·g <sup>-1</sup>  | 61 % after 50 cycles at 20 mA·g <sup>-1</sup>    | 44.2 mAh·g <sup>-1</sup> at 500 mA·g <sup>-1</sup> | 0.8 mol·L <sup>-1</sup> KPF <sub>6</sub> in EC/DEC(1:1)     | -                             | 7         |
| <b>KTi<sub>2</sub>(PO<sub>4</sub>)<sub>3</sub></b> | 75.6 mAh·g <sup>-1</sup> at 64 mA·g <sup>-1</sup> | ~95 % after 100 cycles at 64 mA·g <sup>-1</sup>  | 65 mAh·g <sup>-1</sup> at 640 mA·g <sup>-1</sup>   | 0.8 mol·L <sup>-1</sup> KPF <sub>6</sub> in EC/DEC(1:1)     | 1.0 mg·cm <sup>-2</sup>       | 8         |
| <b>MoS<sub>2</sub></b>                             | 73 mAh·g <sup>-1</sup> at 10 mA·g <sup>-1</sup>   | 97.5 % after 200 cycles at 10 mA·g <sup>-1</sup> | 55 mAh·g <sup>-1</sup> at 160 mA·g <sup>-1</sup>   | 60 uL 0.5mol·L <sup>-1</sup> KPF <sub>6</sub> in EC/PC(1:1) | 2.0 mg·cm <sup>-2</sup>       | 9         |
| <b>Graphite</b>                                    | 263 mAh·g <sup>-1</sup> at 28 mA·g <sup>-1</sup>  | 50 % after 50 cycles at 140 mA·g <sup>-1</sup>   | 80 mAh·g <sup>-1</sup> at 279 mA·g <sup>-1</sup>   | 0.8 mol·L <sup>-1</sup> KPF <sub>6</sub> in EC/DEC(1:1)     | 2.0 mg·cm <sup>-2</sup>       | 10        |
| <b>KVPO<sub>4</sub>F</b>                           | 150 mAh·g <sup>-1</sup> at 20 mA·g <sup>-1</sup>  | 91 % after 100 cycles at 100 mA·g <sup>-1</sup>  | 65 mAh·g <sup>-1</sup> at 2000 mA·g <sup>-1</sup>  | 80 uL 1 mol·L <sup>-1</sup> KPF <sub>6</sub> in EC/PC(1:1)  | 2.0 mg·cm <sup>-2</sup>       | This work |
|                                                    | 127 mAh·g <sup>-1</sup> at 50 mA·g <sup>-1</sup>  | 95 % after rate test at 50 mA·g <sup>-1</sup>    | 60 mAh·g <sup>-1</sup> at 1000 mA·g <sup>-1</sup>  | 80 uL 1 mol·L <sup>-1</sup> KPF <sub>6</sub> in EC/PC(1:1)  | 4.0 mg·cm <sup>-2</sup>       |           |

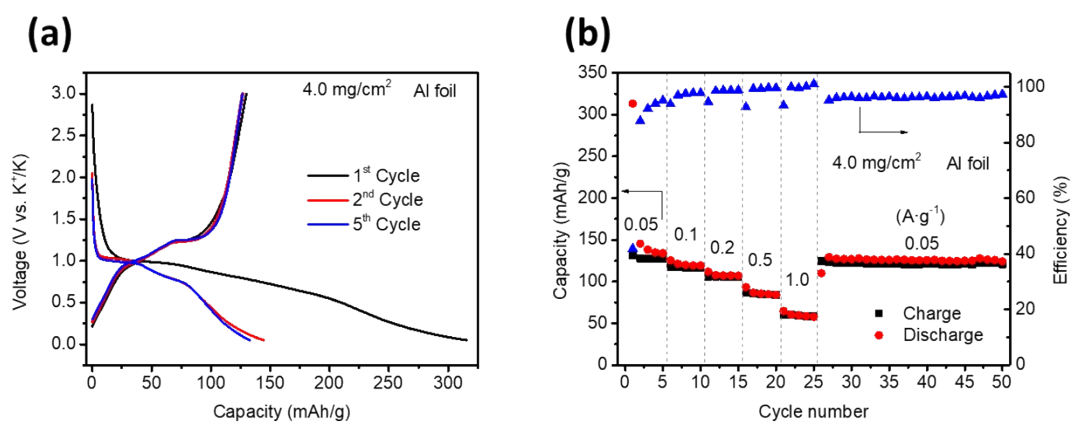

Figure S6. (a) Voltage profiles and (b) Rate performance of electrodes using aluminum foil as a current collector and with a higher mass loading of active material (4.0 mg/cm<sup>2</sup>).

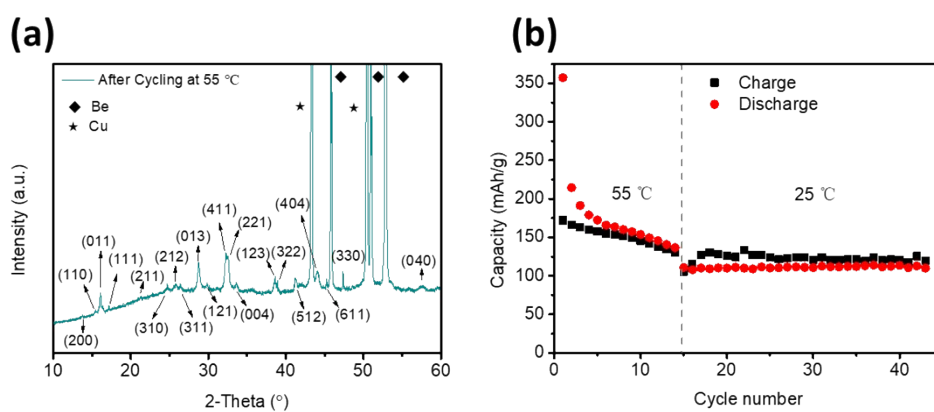

Figure S7. (a) XRD patterns of the electrode after 50 cycles at 55 °C; (b) Cycling performance of the KVPO<sub>4</sub>F electrode transferring from 55 °C to 25 °C.



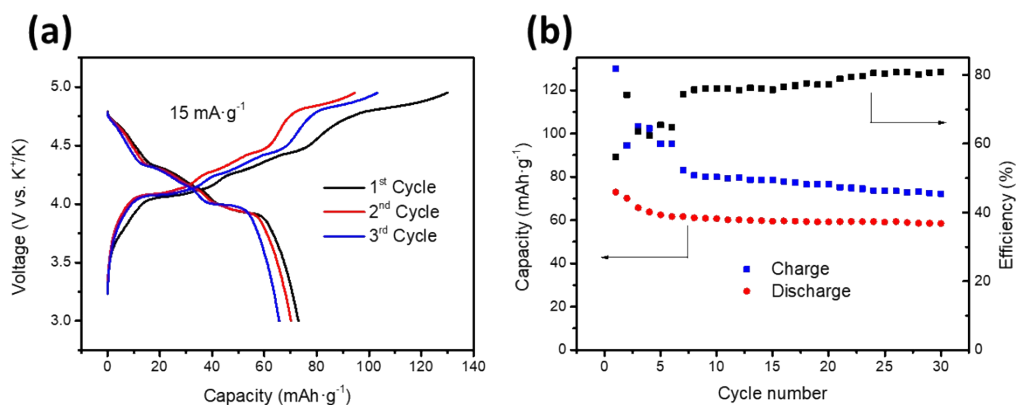

Figure S8. (a) The voltage profiles of the as-prepared KVPO<sub>4</sub>F as cathode for K-ion half-cell within 3.0 - 4.95 V (vs. K<sup>+</sup>/K) and the corresponding (b) Cycling performance.

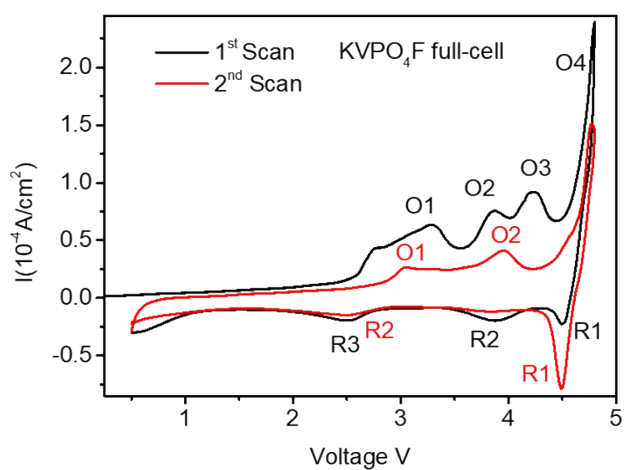

Figure S9. The CV curves of the symmetric KVPO<sub>4</sub>F full cell with the oxidation peaks referring to the structure evolution from KVPO<sub>4</sub>F to K<sub>0.75</sub>VPO<sub>4</sub>F (O1), K<sub>0.625</sub>VPO<sub>4</sub>F (O2), K<sub>0.5</sub>VPO<sub>4</sub>F (O3) and VPO<sub>4</sub>F (O4), as suggested by Ceder et al<sup>11</sup>.

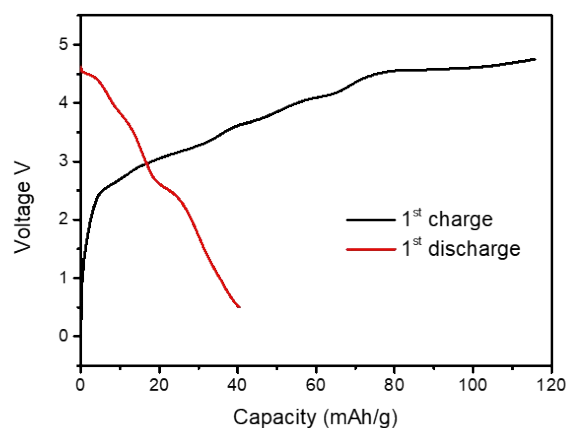

Figure S10. The voltage profiles of the 1<sup>st</sup> cycle for the symmetric KVPO<sub>4</sub>F full cell.

## References

- 1 K. Chihara, A. Katogi, K. Kubota and S. Komaba, *Chem. Commun.*, 2017, **53**, 5208-5211.
- 2 S. S. Fedotov, N. R. Khasanova, A. S. Samarin, O. A. Drozhzhin, D. Batuk, O. M. Karakulina, J. Hadermann, A. M. Abakumov and E. V. Antipov, *Chem. Mater.*, 2016, **28**, 411-415.
- 3 Z. Jian, Z. Xing, C. Bommier, Z. Li and X. Ji, *Adv. Energy Mater.*, 2016, **6**, 1-5.
- 4 R. Rosten, M. Koski and E. Koppa, *J. Undergrad. Mater. Res.*, 2018, **2**, 1-4.
- 5 S. Dong, Z. Li, Z. Xing, X. Wu, X. Ji and X. Zhang, *ACS Appl. Mater. Interfaces*, 2018, **10**, 15542-15547.
- 6 B. Kishore, V. G and N. Munichandraiah, *J. Electrochem. Soc.*, 2016, **163**, A2551-A2554.
- 7 J. Han, M. Xu, Y. Niu, G. N. Li, M. Wang, Y. Zhang, M. Jia and C. M. Li, *Chem. Commun.*, 2016, **52**, 11274-11276.
- 8 J. Han, Y. Niu, S. Bao, Y.-N. Yu, S.-Y. Lu and M. Xu, *Chem. Commun.*, 2016, **52**, 11661-11664.
- 9 X. Ren, Q. Zhao, W. D. McCulloch and Y. Wu, *Nano Res.*, 2017, **10**, 1313-1321.
- 10 Z. Jian, W. Luo and X. Ji, *J. Am. Chem. Soc.*, 2015, **137**, 11566-11569.
- 11 H. Kim, D. Seo, M. Bianchini, R. J. Clément, H. Kim, J. C. Kim, Y. Tian, T. Shi, W. Yoon and G. Ceder, *Adv. Energy Mater.*, 2018, **8**, 1801591.
